# Supplementary material for: Zwitterionic Functionalization of Persistent Luminescence Nanoparticles: Physicochemical Characterizations and In Vivo Biodistribution in Mice
Source: MDPI journal article supplement (doi:10.3390/coatings13111913), 2023-11-08
Supplement: s1 [file s1]

Article

# Zwitterionic Functionalization of Persistent Luminescence Nanoparticles: Physicochemical Characterizations and In Vivo Biodistribution in Mice

Delphine Dassonville <sup>1,†</sup>, Thomas Lécuyer <sup>1,\*,†</sup>, Johanne Seguin <sup>1</sup>, Yohann Corvis <sup>1</sup>, Jianhua Liu <sup>1</sup>, Guanyu Cai <sup>1</sup>, Julia Mouton <sup>2,3</sup>, Daniel Scherman <sup>1</sup>, Nathalie Mignet <sup>1</sup> and Cyrille Richard <sup>1,\*</sup>

<sup>1</sup> Unité de Technologies Chimiques et Biologiques pour la Santé (UTCBS), CNRS UMR8258, Inserm U1267, Université Paris Cité, 75006 Paris, France; nathalie.mignet@parisdescartes.fr

<sup>2</sup> EPF Graduate School of Engineering, 34000 Montpellier, France; julia.mouton@epf.fr

<sup>3</sup> Polymers Composites and Hybrids, IMT Mines d'Alès, 30100 Alès, France; julia.mouton@epf.fr

\* Correspondence: cyrille.richard@u-paris.fr

† These authors contributed equally to this work.

## Supplementary Information

IR and NMR characterizations of SBS ligand

RMN <sup>1</sup>H (DMSO-d<sub>6</sub>, 400 MHz): δ 0.5-0.6 (t, 2H), 1.6-1.8 (m, 2H), 1.9-2.0 (m, 2H), 2.4-2.5 (t, 2H), 3.0 (s, 6H), 3.1-3.3 (m, 2H), 3.3-3.4 (m, 2H), 3.5 (s, 9H).

FT-IR: (CH<sub>2</sub>) = 2957 cm<sup>-1</sup>, ν<sub>1</sub>(SiOCH<sub>3</sub>) = 2842 cm<sup>-1</sup>, ν (C-C) = 1477 cm<sup>-1</sup>, ν (C-N) = 1205 cm<sup>-1</sup>, ν (S=O) = 1179 cm<sup>-1</sup>, ν<sub>2</sub>(SiOCH<sub>3</sub>) = 1073 cm<sup>-1</sup>.

Analytical and spectra data agreed with literature [1].

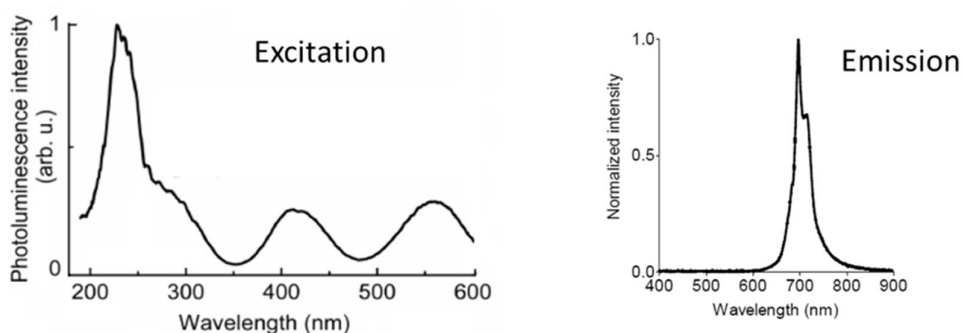

**Figure S1.** Excitation (left) and emission (right) spectra of ZGO NPs.

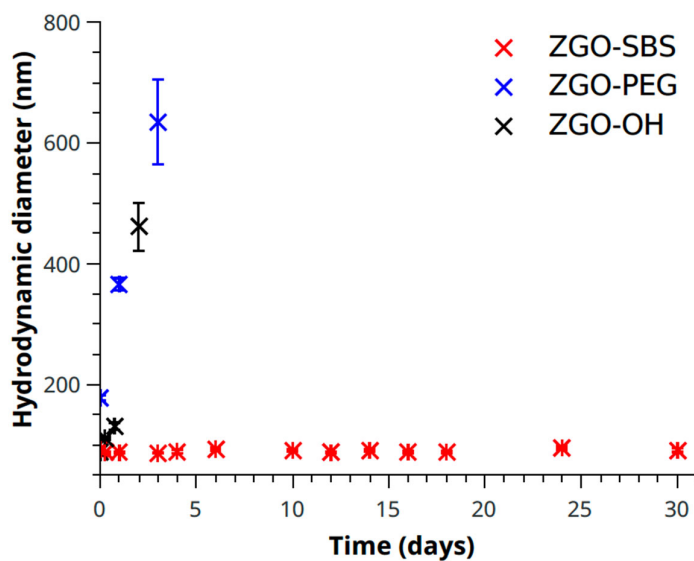

Figure S2. Stability of ZGO NPs with different coatings in water (2 mg/mL).

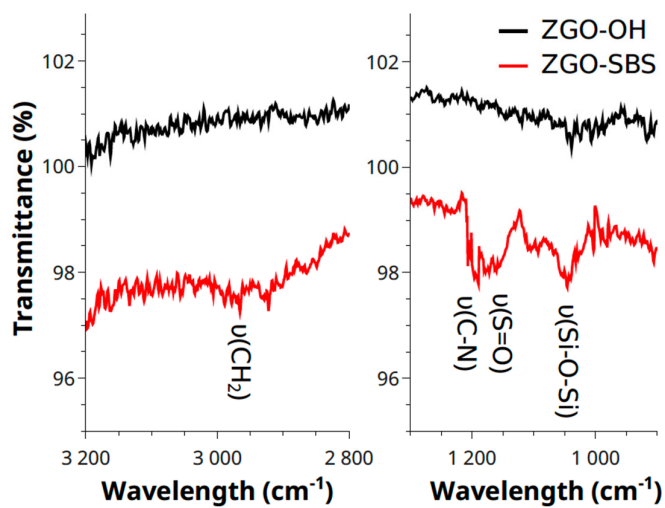

Figure S3. ATR FT-IR spectra of ZGO-OH (black) and ZGO-SBS (red).

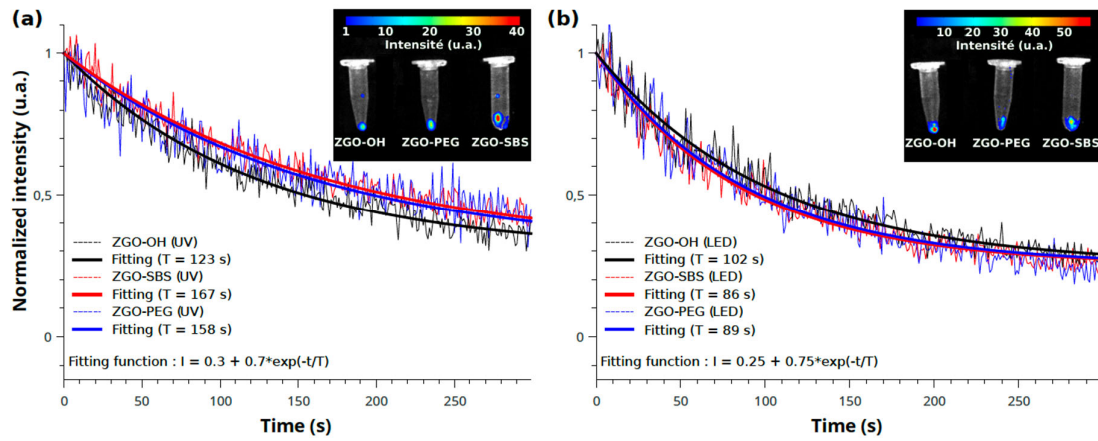

**Figure S4.** Persistent luminescence decay curves and intensity measurements (inset) of different ZGO NPs following (a) UV excitation and (b) LED (515 nm) excitation.

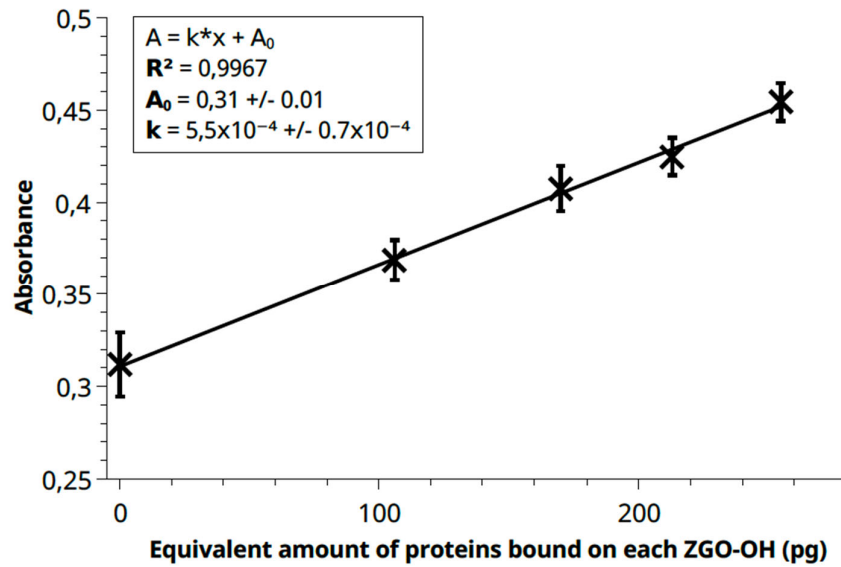

**Figure S5.** Calibration curve used to link absorbance at 595 nm to the amount of proteins grafted on ZGO-OH NPs made with known amounts of Human Serum Albumin (HSA).

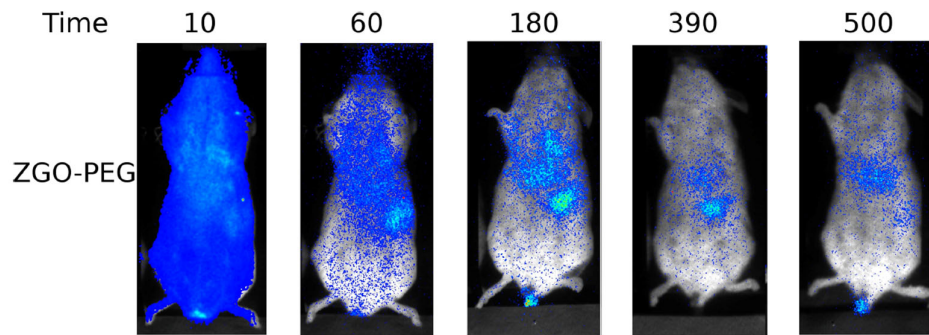

**Figure S6.** *In vivo* biodistribution of ZGO-PEG NPs in mice over the time (min).

**Table S1.** Influence of reaction time on ZGO functionalization with SBS.

|                                 | Reaction time | $\Delta$ HD (nm) | ZP (mv) | Stability (days) |
|---------------------------------|---------------|------------------|---------|------------------|
| SBS 5.5 w.e.,<br>pH 11,<br>80°C | 3 h           | + 23             | - 8     | /                |
|                                 | 6 h           | + 1              | - 2     | 10               |
|                                 | Overnight     | + 103            | + 3     | 0                |

**Table S2.** Influence of ligand amount on ZGO functionalization with SBS.

|                        | SBS (w.e.) | $\Delta$ HD (nm) | ZP (mv) | Stability (days) |
|------------------------|------------|------------------|---------|------------------|
| pH 11,<br>80°C,<br>6 h | 5.5        | +1               | -2      | 10               |
|                        | 11         | + 8              | - 1     | > 30             |
|                        | 15         | + 8              | + 1     | > 30             |
|                        | 20         | > 1000           | /       | 0                |

## Reference

1. Knowles, B.R.; Wagner, P.; Maclaughlin, S.; Higgins, M.J.; Molino, P.J. Silica Nanoparticles Functionalized with Zwitterionic Sulfobetaine Siloxane for Application as a Versatile Antifouling Coating System. *ACS Appl. Mater. Interfaces* **2017**, *9*, 18584–18594.
